# Supplementary material
Source: publisher site journal article supplement (https://www.dovepress.com/article/502496)
Supplement: Supplementary file 1 [file get_supplementary_file.php]

**
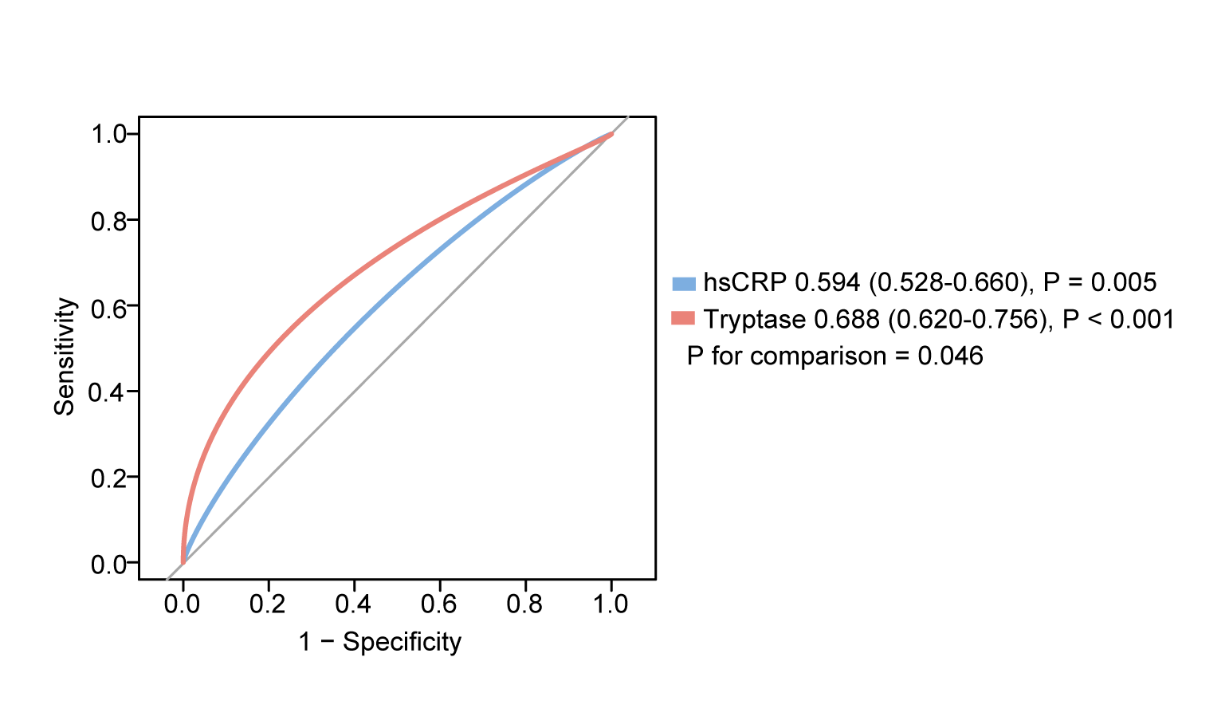
**

**Figure S1** Receiver operating characteristic curve of tryptase and hsCRP. The AUC of tryptase was higher than that of hs-CRP. hsCRP: high-sensitivity C-reactive protein

**
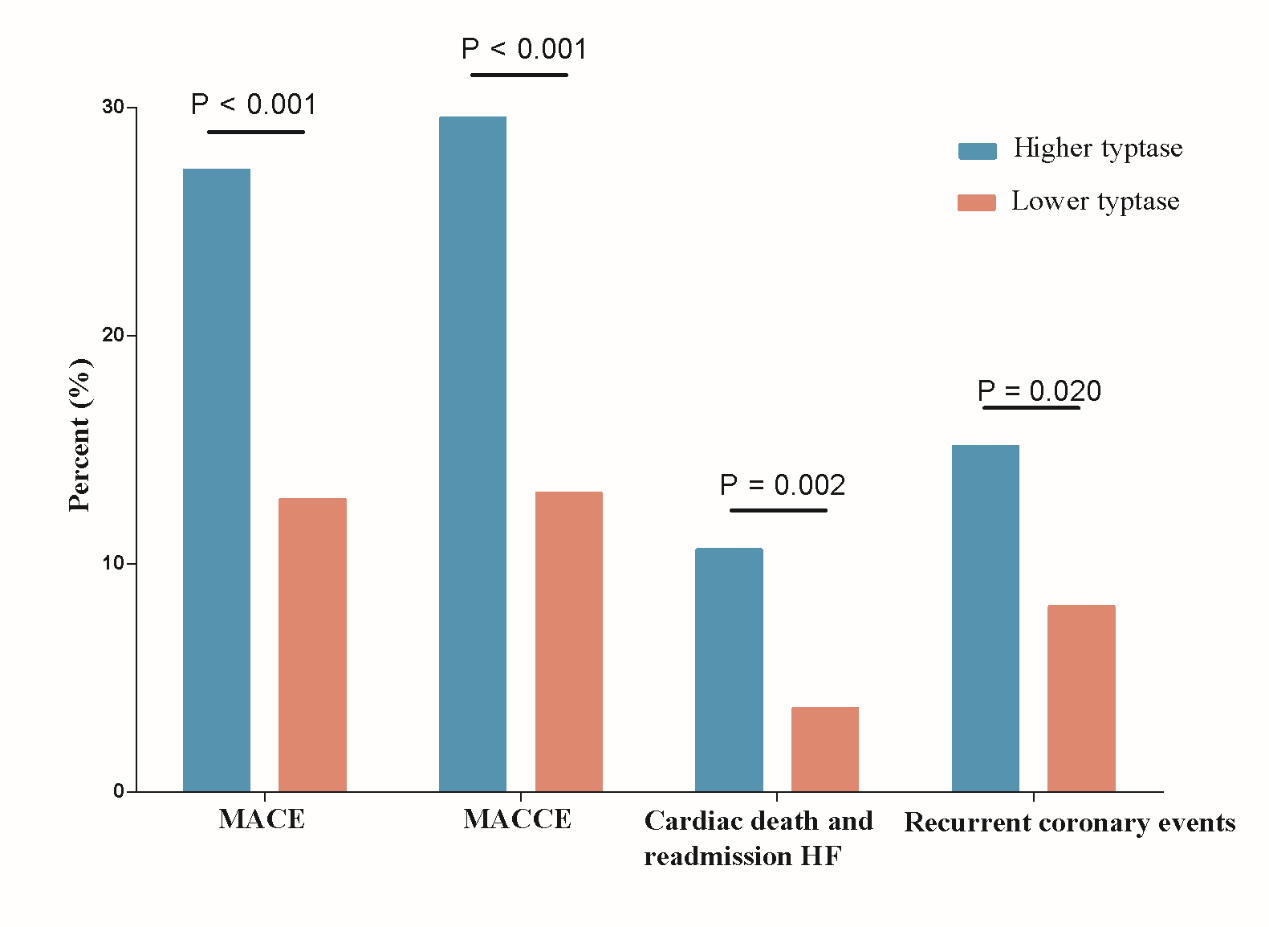
**

**Figure S2**. The differences between the higher and the lower tryptase group in MACE, MACCE and their components. The incidence of adverse prognosis in higher tryptase group was higher than that in lower group. MACE: major adverse cardiac events; MACCE: major adverse cerebrovascular and cardiovascular events; HF: heart failure.


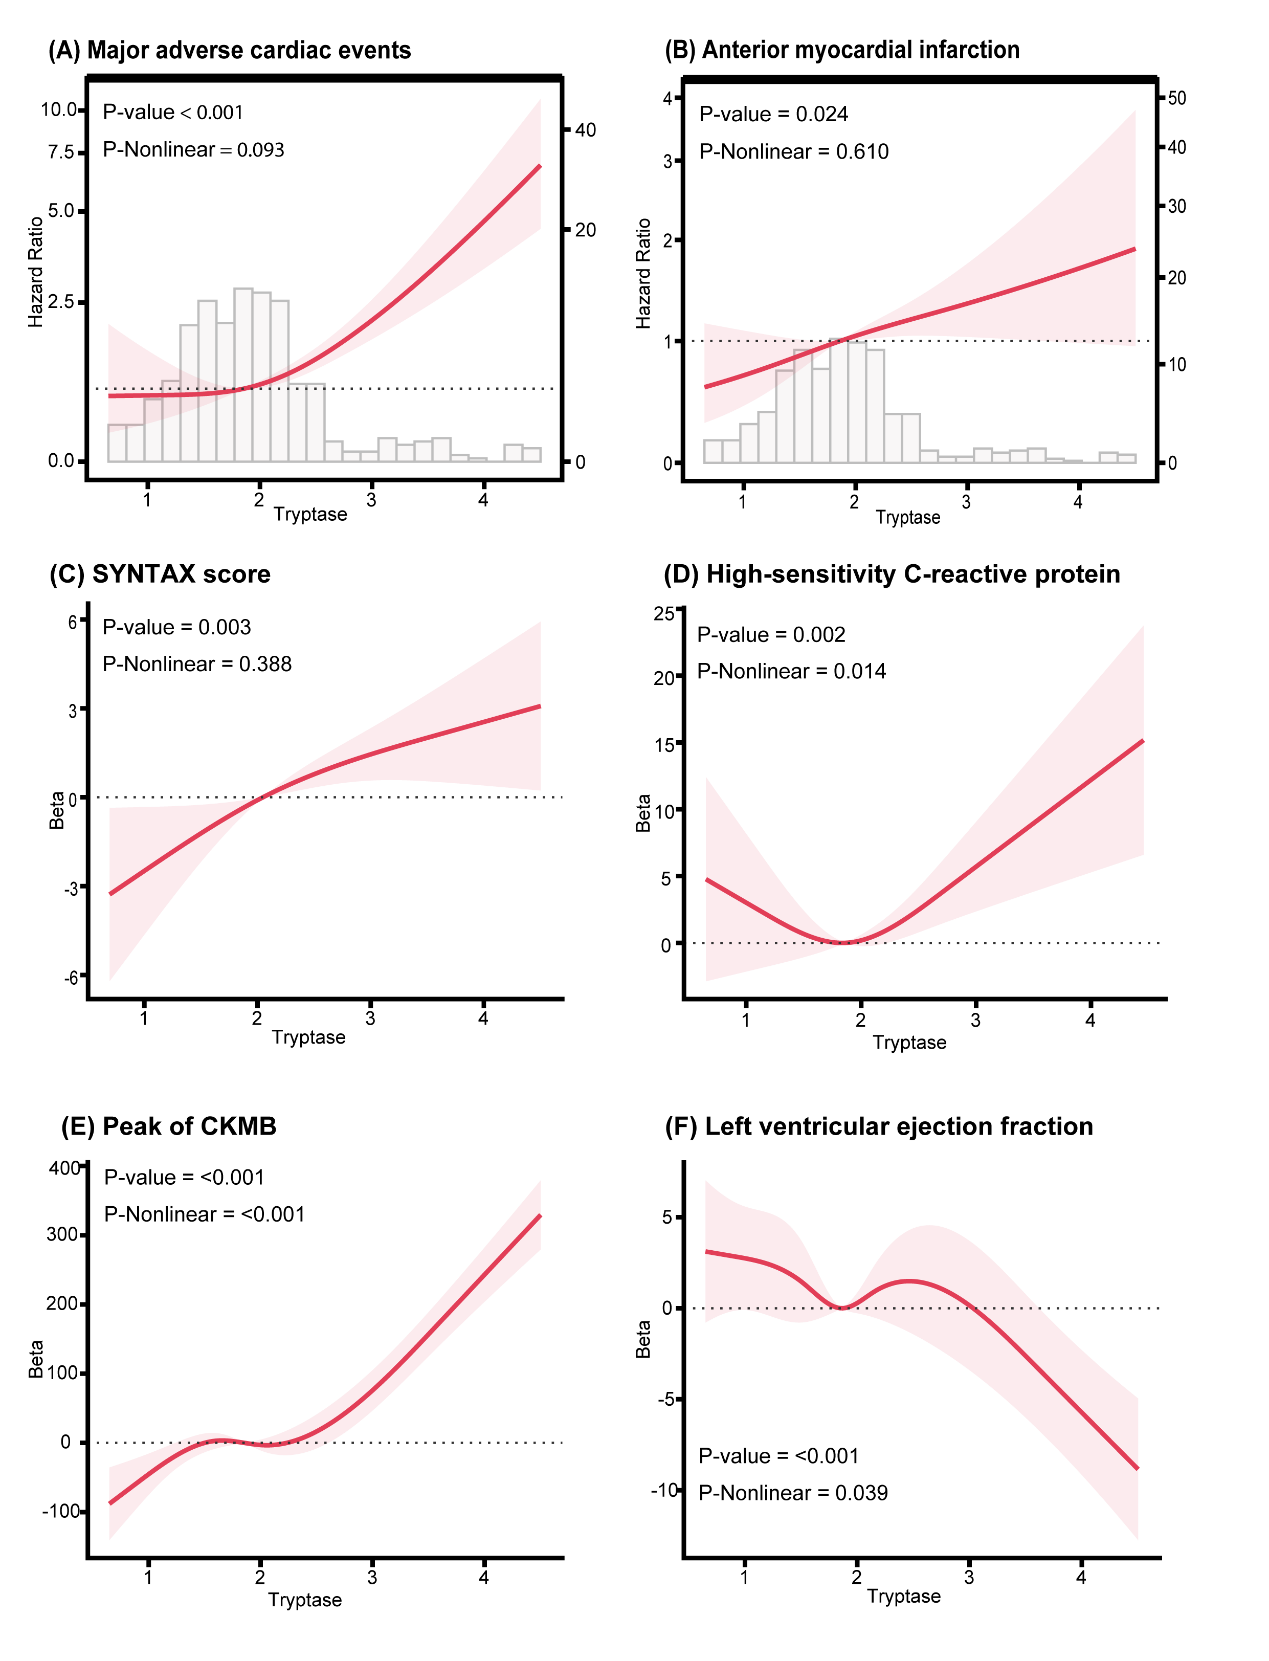


**Figure S3**: Restricted cubic spline between tryptase and common cardiovascular prognosis risk assessment index. (A) major adverse cardiac events; (B) anterior myocardial infarction; (C) SYNTAX score; (D) high-sensitivity C-reactive protein; (E) peak of CKMB; (F). left ventricular ejection fraction.


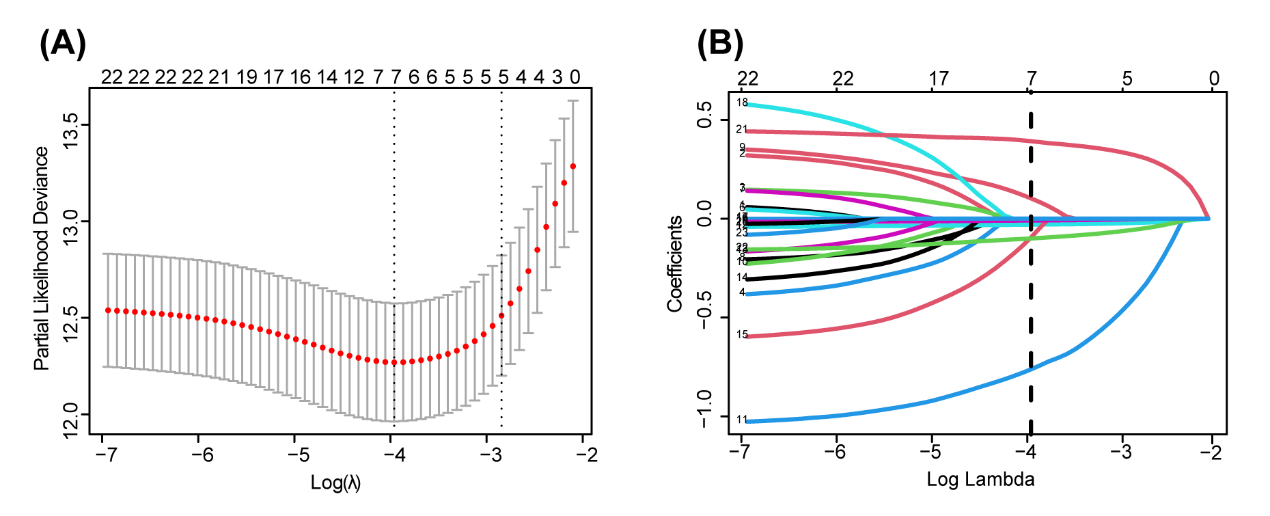


**Figure S4.** LASSO regression analysis for MACE. Selection of tuning parameter (λ) using 10-fold cross-validation (A) and LASSO coefficient profiles of variables (B).
